# Supplementary material for: Molecular dynamics study of coil-to-globule transition in a thermo-responsive oligomer bound to various surfaces: hydrophilic surfaces stabilize the coil form
Source: Royal Society of Chemistry journal article supplement (doi:10.1039/c8cp05396k), 2018-01-01
Supplement: c8cp05396k1.pdf [file c8cp05396k1.pdf]

# **Molecular dynamics study of coil-to-globule transition in thermo-responsive oligomer bound to various surfaces: hydrophilic surfaces stabilize the coil form.**

Giuseppe Consiglio<sup>\*,a</sup> and Giuseppe Forte<sup>\*,b</sup>

<sup>a</sup> *Dipartimento di Scienze Chimiche, Università di Catania, I-95125 Catania, Italy. E-mail: [gconsiglio@dii.unict.it](mailto:gconsiglio@dii.unict.it)*

<sup>b</sup> *Dipartimento di Scienze del Farmaco, Università di Catania, I-95125 Catania, Italy. E-mail: [gforte38@gmail.com](mailto:gforte38@gmail.com)*

## **Electronic Supplementary Information**

MD simulations with durations of 200 ps were performed, using the same conditions reported in the experimental section, starting from a configuration characterized by the polymer placed with the backbone orientation orthogonal to surfaces.

The box size is 13.0 x 7.5 x 13.0 nm for GO and 13.0 x 7.5 x 16.0 nm for SiO<sub>2</sub>, water molecules were added to solvate the systems at a density = 1 g/cc.

During the last 50 ps 5 structures were randomly sampled and optimized, hence it was calculated the energy of interaction ( $E_i$ ) for such configurations, with  $E_i$  defined as follows:

$$E_i = E_{system} - (E_{surface} + E_{water})$$

where

$$E_{system} = E_{surface} + E_{PNIPAM} + E_{water} + E_{surface-water} + E_{PNIPAM-water} + E_{surface-PNIPAM}$$

therefore

$$E_i = E_{PNIPAM} + E_{surface-water} + E_{PNIPAM-water} + E_{surface-PNIPAM}$$

The same calculations were performed for the starting configuration (backbone orientation almost parallel to the surfaces). Differences between the lowest values of the  $E_i$  for each case are reported below ( $\Delta E_i = E_{i-parallel} - E_{i-orthogonal}$ ):

| Surface | T(K) | $\Delta E_i$ (kcal mol <sup>-1</sup> ) | standard deviation (par/orth) |
|---------|------|----------------------------------------|-------------------------------|
|---------|------|----------------------------------------|-------------------------------|

|                  |     |        |           |
|------------------|-----|--------|-----------|
| SiO <sub>2</sub> | 305 | -36.81 | 0.97/1.12 |
| SiO <sub>2</sub> | 300 | -34.58 | 1.21/0.89 |
| GO               | 305 | -23.98 | 1.15/1.33 |
| GO               | 300 | -21.63 | 0.93/1.02 |

The results reported above suggest that a backbone orientation parallel to surface is the favored configuration; this leads us to hypothesize that long MD simulations, starting from an orthogonal orientation of the backbone, bring to the parallel orientation of the backbone; in this case the chain is affected by the interactions with surfaces (in turn temperature changes affect these interactions) whereas a negligible effect, due to the surface, is expected when the chain is orthogonal.

It is also to point out that  $E_{\text{water}}$  is missing in the analysis reported above. Suppose that surface-water and PNIPAM-water H-bonds are broken due to the formation of surface-PNIPAM H-bonds, in that case water molecules would be released from the surface and PNIPAM to the bulk followed by the recovery of water-water H-bond. Hence, there are more water-water H-bonds near the surface and PNIPAM for the parallel configuration. In other words if  $E_{\text{water}}$  was included in the calculation, by considering a huge amount of water molecules, the parallel configuration would become even more favorable in terms of the system energy.
